# Supplementary material
Source: PubMed Central journal article supplement (PMC3560429)
Supplement: bi301269a_si_001.pdf [file bi301269a_si_001.pdf]

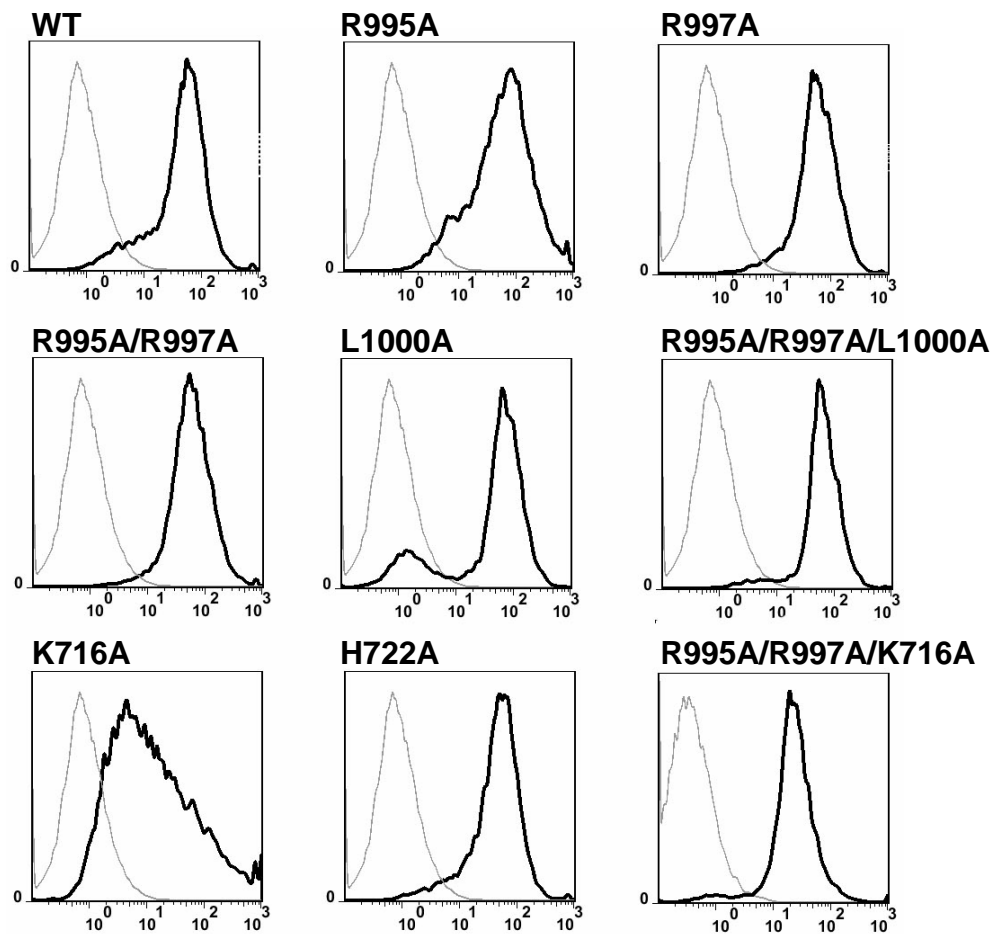

Supporting Figure 1: Cell-surface expression levels of wild-type and mutant  $\alpha_{IIB}\beta_3$  CHO cells.

Cells were harvested, and incubated with Tyrode-Hepes Buffer alone (grey line) or with an anti- $\beta_3$  antibody (black line). A PE-labeled secondary antibody was used to detect bound anti- $\beta_3$  antibody and flow cytometry analysis was performed in Tyrode-Hepes Buffer. Cells incubated only with the secondary antibody (grey line) were used as controls. Histograms were generated using FlowJo. The data is representative of three separate experiments.
