# Supplementary material
Source: PubMed Central journal article supplement (PMC3560429)
Supplement: bi301269a_si_002.pdf [file bi301269a_si_002.pdf]

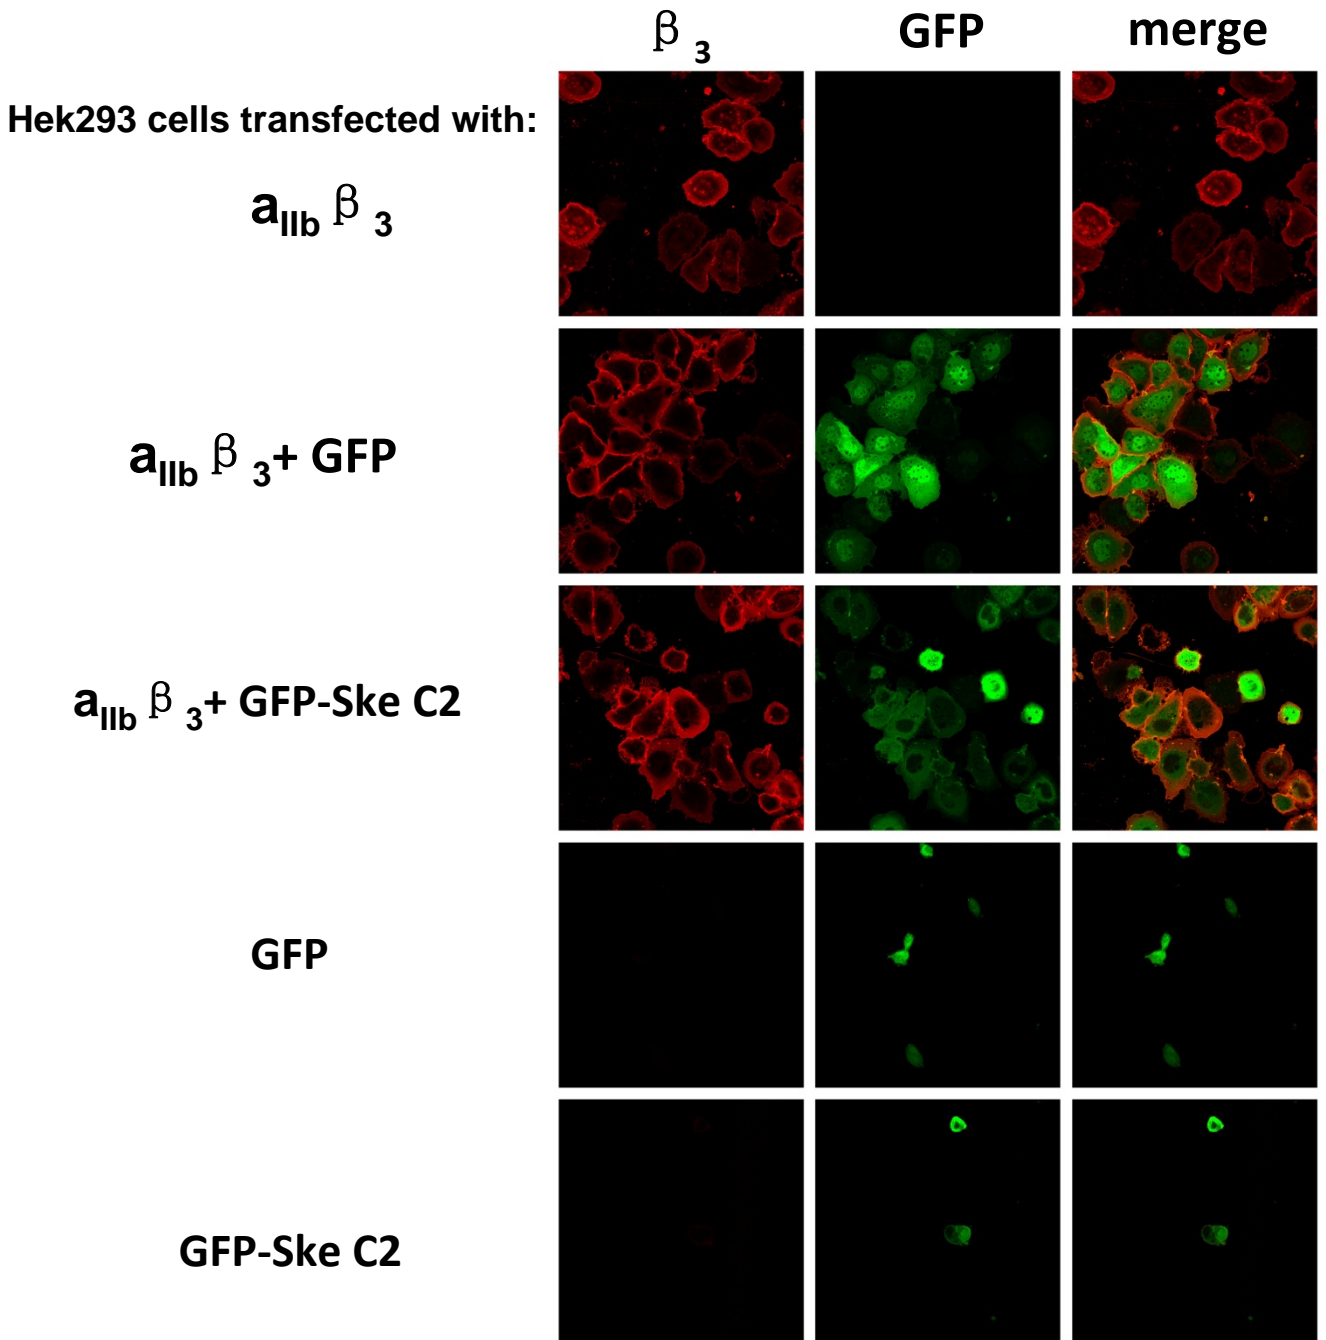

Supporting Figure 2: Hek293 cells co-transfected with  $\alpha_{IIb} \beta_3$  and GFP-Ske C2 show inhibited cell spreading on fibrinogen.

Subconfluent Hek293 cells were transfected with  $\alpha_{IIb} \beta_3$ , GFP-Ske C2 or GFP plasmids individually and in combination, and harvested 48 hour after transfection. Cells were allowed to adhere for 2 hours on fibrinogen-coated slides, then fixed and stained with anti- $\beta_3$  antibody and PE-labeled secondary antibody. GFP and  $\alpha_{IIb} \beta_3$  expression were observed with confocal microscopy.
